# Supplementary material for: Reverse vaccinology and subtractive genomics reveal new therapeutic targets against Mycoplasma pneumoniae: a causative agent of pneumonia
Source: R Soc Open Sci. 2019 Jul 31;6(7):190907. doi: 10.1098/rsos.190907 (PMC6689572; doi:10.1098/rsos.190907)
Supplement: Unassigned Genes [file rsos190907supp28.csv]

	Mycoplasma_pneumoniae_19294_strain_19294_protein	Mycoplasma_pneumoniae_309_strain_309_protein	Mycoplasma_pneumoniae_39443_strain_39443_protein	Mycoplasma_pneumoniae_51494_strain_51494_protein	Mycoplasma_pneumoniae_54089_strain_54089_protein	Mycoplasma_pneumoniae_54524_strain_54524_protein	Mycoplasma_pneumoniae_85084_strain_85084_protein	Mycoplasma_pneumoniae_85138_strain_85138_protein	Mycoplasma_pneumoniae_FH_strain_FH_protein	Mycoplasma_pneumoniae_M1139_strain_M1139_protein	Mycoplasma_pneumoniae_M129-B7_strain_M129-B7_protein	Mycoplasma_pneumoniae_M129_strain_M129_protein	Mycoplasma_pneumoniae_M2592_strain_M2592_protein	Mycoplasma_pneumoniae_M29_strain_M29_protein	Mycoplasma_pneumoniae_MAC_strain_Mac_protein	Mycoplasma_pneumoniae_PI_1428_strain_PI_1428_protein	Mycoplasma_pneumoniae_PO1_strain_PO1_protein	Mycoplasma_pneumoniae_strain_1005_protein	Mycoplasma_pneumoniae_strain_1006_protein	Mycoplasma_pneumoniae_strain_1134_protein	Mycoplasma_pneumoniae_strain_1801_protein	Mycoplasma_pneumoniae_strain_303_protein	Mycoplasma_pneumoniae_strain_519_protein	Mycoplasma_pneumoniae_strain_549_protein	Mycoplasma_pneumoniae_strain_682_protein	Mycoplasma_pneumoniae_strain_685_protein	Mycoplasma_pneumoniae_strain_986_protein	Mycoplasma_pneumoniae_strain_C267_protein	Mycoplasma_pneumoniae_strain_CIP10349_protein	Mycoplasma_pneumoniae_strain_CIP10361_protein	Mycoplasma_pneumoniae_strain_CIP12206_protein	Mycoplasma_pneumoniae_strain_CIP12235_protein	Mycoplasma_pneumoniae_strain_CIP12261_protein	Mycoplasma_pneumoniae_strain_CIP12265_protein	Mycoplasma_pneumoniae_strain_CIP12267_protein	Mycoplasma_pneumoniae_strain_CIP12311_protein	Mycoplasma_pneumoniae_strain_CIP12355_protein	Mycoplasma_pneumoniae_strain_CIP12357_protein	Mycoplasma_pneumoniae_strain_CO103_protein	Mycoplasma_pneumoniae_strain_CO36_protein	Mycoplasma_pneumoniae_strain_CO3_protein	Mycoplasma_pneumoniae_strain_E16_protein	Mycoplasma_pneumoniae_strain_E57_protein	Mycoplasma_pneumoniae_strain_FH-tet-R_protein	Mycoplasma_pneumoniae_strain_FH_1965_protein	Mycoplasma_pneumoniae_strain_FH_2009_protein	Mycoplasma_pneumoniae_strain_FL1_protein	Mycoplasma_pneumoniae_strain_FL8_protein	Mycoplasma_pneumoniae_strain_G6_protein
OG0000730									WP_041363688.1
OG0000731												NP_109714.1
OG0000732												NP_109725.1
OG0000733												NP_109813.1
OG0000734												NP_109887.1
OG0000735												NP_109967.1
OG0000736												NP_110253.1
OG0000737												NP_110276.1
OG0000738												YP_009121698.1
OG0000739												YP_009121699.1
OG0000740												YP_009121700.1
OG0000741												YP_009121703.1
OG0000742												YP_009121704.1
OG0000743												YP_009121706.1
OG0000744												YP_009121707.1
OG0000745												YP_009121708.1
OG0000746												YP_009121709.1
OG0000747												YP_009121711.1
OG0000748												YP_009121712.1
OG0000749												YP_009121713.1
OG0000750												YP_009121714.1
OG0000751												YP_009121715.1
OG0000752												YP_009121716.1
OG0000753												YP_009121717.1
OG0000754												YP_009121718.1
OG0000755												YP_009121720.1
OG0000756												YP_009121722.1
OG0000757												YP_009121723.1
OG0000758												YP_009121725.1
OG0000759												YP_009121726.1
OG0000760												YP_009121727.1
OG0000761												YP_009121729.1
OG0000762												YP_009121731.1
OG0000763												YP_009121732.1
OG0000764												YP_009121735.1
OG0000765												YP_009121737.1
OG0000766												YP_009121738.1
OG0000767												YP_009121740.1
OG0000768												YP_009121741.1
OG0000769														WP_038534445.1
OG0000770																						WP_098363682.1
OG0000771																											WP_098363670.1
OG0000772																														WP_081038990.1
OG0000773																														WP_081038995.1
OG0000774																																		WP_058141077.1
OG0000775																																				WP_058129036.1
OG0000776																																				WP_081038395.1
OG0000777																																				WP_081038396.1
OG0000778																																																	WP_098363699.1
OG0000779
[truncated: 39 more columns]
